# Supplementary material for: Social Protection Interventions for TB-Affected Households: A Scoping Review
Source: PubMed Central journal article supplement (PMC10076998; doi:10.4269/ajtmh.22-0470), 2023-02-20
Supplement: tpmd220470.SD1.pdf [file tpmd220470.SD1.pdf]

Details of Social Protection Identified

| Programme Name, Country               | Type of Social Protection | Social Protection Intervention                  | Beneficiary              | Eligibility criteria                                                                                                                                                                                            | Funding              | Conditions                                                                                                                                     | TB Specific |
|---------------------------------------|---------------------------|-------------------------------------------------|--------------------------|-----------------------------------------------------------------------------------------------------------------------------------------------------------------------------------------------------------------|----------------------|------------------------------------------------------------------------------------------------------------------------------------------------|-------------|
| Bolsa Familia Programme (BFP), Brazil | Conditional Cash transfer | Benefits vary from US\$18 to US\$175 per month. | TB-affected household s. | Families defined as poor (per capita monthly income US\$25.60-51.20) with pregnant or lactating women or children and adolescents aged 17 years or younger<br><br>OR<br>All extremely poor families (per capita | Government of Brazil | Attendance at prenatal and postnatal monitoring sessions. Access to nutrition and vaccination monitoring for patients' children aged 0-7 years | No          |

|                                   |                                 |                                                                                                                                                                                                           |                                    |                                                                                                        |                                |                                                                                                                                                   |     |
|-----------------------------------|---------------------------------|-----------------------------------------------------------------------------------------------------------------------------------------------------------------------------------------------------------|------------------------------------|--------------------------------------------------------------------------------------------------------|--------------------------------|---------------------------------------------------------------------------------------------------------------------------------------------------|-----|
|                                   |                                 |                                                                                                                                                                                                           |                                    | monthly income<br><US\$25.60).                                                                         |                                | school<br>attendance                                                                                                                              |     |
| CRESPIIT,<br>Peru                 | Mixed<br>Intervention           | Ranging from \$0-\$230<br>(average \$172).<br>Depending on if<br>conditions were met<br>'optimally' or<br>'acceptably'.<br><br>High protein food<br>basket, home visits,<br>TB workshops and TB<br>clubs. | TB-<br>affected<br>household<br>s. | Newly diagnosed<br>patients with TB from<br>study-site health posts<br>and their household<br>members. | Joint Global<br>Health Trials. | Screening for<br>TB and MDR-<br>TB. Adherence<br>to TB treatment<br>or TB-<br>preventive<br>therapy. Engage<br>with CRESIPT<br>social activities. | Yes |
| Ecuador's<br>national<br>monetary | Conditional<br>Cash<br>transfer | \$240 each month                                                                                                                                                                                          | Patients<br>with DR-<br>TB         | People with DR-TB<br>registered with the<br>Ecuador NTP in 2011.                                       | Government<br>of Ecuador       | Adherence to<br>DR-TB<br>treatment                                                                                                                | Yes |

|                                                  |                           |                                                                                                          |                                                 |                                                                 |                       |                                                                          |     |
|--------------------------------------------------|---------------------------|----------------------------------------------------------------------------------------------------------|-------------------------------------------------|-----------------------------------------------------------------|-----------------------|--------------------------------------------------------------------------|-----|
| incentive program for drug-resistant TB, Ecuador |                           |                                                                                                          |                                                 |                                                                 |                       | (defined as taking medications on 26 days per month for up to 24 months) |     |
| Global Fund programme, China                     | Conditional Cash transfer | To cover transportation costs (US\$10) and nutrition support (US\$10)                                    | Adults with confirmed MDR-TB living in poverty. | Adults with confirmed MDR-TB living in poverty.                 | Global Fund Programme | Not defined                                                              | Yes |
| Kenya National Tuberculosis Leprosy and Lung     | Food/Nutrition Support    | 3 types of support. May qualify for one, a combination, or all three of the following interventions: (1) | Those with TB who are severely                  | Severe undernourishment as confirmed by nutritional assessment. | Public funding        | Not defined                                                              | Yes |

|                                                                                        |                             |                                                                                             |                                    |                                                                                                                                                                                    |             |     |    |
|----------------------------------------------------------------------------------------|-----------------------------|---------------------------------------------------------------------------------------------|------------------------------------|------------------------------------------------------------------------------------------------------------------------------------------------------------------------------------|-------------|-----|----|
| disease programme, Kenya                                                               |                             | Nutrition education and counselling (2) fortified blended food (3) Vitamin A and pyridoxine | undernourished                     |                                                                                                                                                                                    |             |     |    |
| Kumar Raajratna Bhimrao Ambedkar Vaidakiya Sahay Yojana (KRBAVSY) aka free medical aid | Unconditional Cash Transfer | 500 Rupees paid every month.                                                                | Registered TB patients under RNTCP | Belong to schedule caste (SC), schedule tribe, socially and economically backward or economically backward class and having an annual income less than Rs. 36,000 in an urban area | Not stated. | --- | No |

|                                       |                                 |                                                           |                                                        |                                                                                                         |                                                                        |                                                              |     |
|---------------------------------------|---------------------------------|-----------------------------------------------------------|--------------------------------------------------------|---------------------------------------------------------------------------------------------------------|------------------------------------------------------------------------|--------------------------------------------------------------|-----|
| scheme,<br>India                      |                                 |                                                           |                                                        |                                                                                                         |                                                                        |                                                              |     |
| NCMS,<br>China                        | Insurance<br>Reimburse<br>ment  | Ranging from RMB<br>100,000 to 150,000<br>yuan            | TB<br>patients<br>receiving<br>outpatient<br>treatment | Not defined.                                                                                            | Government<br>of China &<br>Bill and<br>Melinda<br>Gates<br>Foundation | Not defined.                                                 | No  |
| Nikshay<br>Poshan<br>Yojana,<br>India | Conditional<br>Cash<br>transfer | 1000 Rupees (US\$8)<br>paid every two months.             | Patients<br>with TB<br>only.                           | TB diagnosis<br>regardless of age (inc.<br>paediatric patients),<br>household size or<br>poverty level. | Government<br>of India                                                 | Once two<br>months of<br>treatment has<br>been<br>completed. | Yes |
| Psychosoci<br>al Support<br>Groups    | Non-<br>financial               | Food and hygiene<br>parcels assistance in<br>any kinds of | People<br>with MDR-<br>TB                              | Eligibility is assessed<br>on an individual and<br>intervention awarded                                 | KNCV<br>Tuberculosis<br>Foundation                                     | Not defined.                                                 | Yes |

|                             |                    |                                                                                                                                                                                                                                              |                     |                                                             |                                                                                           |             |     |
|-----------------------------|--------------------|----------------------------------------------------------------------------------------------------------------------------------------------------------------------------------------------------------------------------------------------|---------------------|-------------------------------------------------------------|-------------------------------------------------------------------------------------------|-------------|-----|
| (PSSG),<br>Kazakhstan       | Intervention       | documentation, assistance in preparation of dossier and submission to get state allowance, interim housing, and admission of children in kindergarten free of charge and in occupation. Psychological counselling of patients and relatives. |                     | according to individual need.                               | (KNCV) in the framework of the United States Agency for International Development (USAID) |             |     |
| Ramakrishna Mission Free TB | Mixed Intervention | Nutrition support + what was described by                                                                                                                                                                                                    | Patients with MDRTB | Undergoing treatment at Ramakrishna Mission Free TB clinic. | Not stated                                                                                | Not defined | Yes |

|                                                                |                                    |                                                                                                                                 |                 |                                                                                                                                                                                                   |             |              |     |
|----------------------------------------------------------------|------------------------------------|---------------------------------------------------------------------------------------------------------------------------------|-----------------|---------------------------------------------------------------------------------------------------------------------------------------------------------------------------------------------------|-------------|--------------|-----|
| clinic<br>Integrated<br>patient<br>support<br>system,<br>India |                                    | the authors as "cash<br>handouts".                                                                                              |                 |                                                                                                                                                                                                   |             |              |     |
| Regulatory<br>Decree<br>170/91 of<br>Law 1046,<br>Argentina    | Unconditio<br>nal Cash<br>Transfer | Paid monthly. Amount<br>paid is variable<br>according to minimum<br>salary, treatment time<br>and presence of co-<br>morbidity. | Not<br>defined. | Social Assessment by<br>health team and<br>permanent residence<br>at least 2 years in the<br>province of Buenos<br>Aires and not being<br>covered by any other<br>social assistance<br>programme. | Not stated. | Not defined. | Yes |

|                                                   |                           |                                                                                                                      |                        |                                                                                                                |                              |                     |     |
|---------------------------------------------------|---------------------------|----------------------------------------------------------------------------------------------------------------------|------------------------|----------------------------------------------------------------------------------------------------------------|------------------------------|---------------------|-----|
| Southern Health Improvement Samitee (SHIS), India | Food/nutrition support    | Nutrition assistance (\$10)<br>Monthly allotments of:<br>13kg Rice<br>3kg lentils<br>over the duration of 60-90 days | TB patients            | People with smear positive TB living below the poverty line (<\$125/day) in two rural districts of West Bengal | Not for profit organisation. | Not defined.        | Yes |
| STOP-TB Italia Onlus, Senegal                     | Conditional Cash Transfer | 20,000 Franc of the French Community of Africa (FCFA). (US\$35.8)                                                    | TB patients            | TB patients undergoing TB treatment.                                                                           | Not stated                   | Treatment adherence | Yes |
| TB Cero/Zero TB, Peru                             | Mixed Intervention        | Mixed: food vouchers, nutritional supplements, transport to health facilities, chest radiography fees                | TB-affected households | Patient and/or head of household interviewed to determine if there are unmet basic needs within households.    | NGO & Government of Peru     | Not stated          | Yes |



|             |           |                                                                                                                                                                                                                                                     |             |                                                                                                                                      |            |             |     |
|-------------|-----------|-----------------------------------------------------------------------------------------------------------------------------------------------------------------------------------------------------------------------------------------------------|-------------|--------------------------------------------------------------------------------------------------------------------------------------|------------|-------------|-----|
|             |           | for TB evaluation, other medical procedures/medications/healthcare supplies, assistance with accessing social services, rent or utilities payments, furniture, or other expenses (e.g. school fees). Home-based treatment support was also offered. |             | Using a variety of indicators: poverty score, the number of dependents, household income and expenses, and other sources of support. |            |             |     |
| The Rocinha | Community | Supervision of treatment and                                                                                                                                                                                                                        | TB patients | People with TB living in Rocinha.                                                                                                    | Not stated | Not defined | Yes |

|                                                                 |                           |                                                                                                                                                                     |             |                                                                                     |                                                              |              |     |
|-----------------------------------------------------------------|---------------------------|---------------------------------------------------------------------------------------------------------------------------------------------------------------------|-------------|-------------------------------------------------------------------------------------|--------------------------------------------------------------|--------------|-----|
| Intervention, Brazil                                            | Participation             | implementation of educational activities to establish a supportive network.                                                                                         |             |                                                                                     |                                                              |              |     |
| Transportation subsidy initiative (TSI) to poor patients, China | Conditional Cash Transfer | Intended for transport only. 10CNY per round trip up to a total of 60CNY (for newly diagnosed patients) and 80CNY for retreated during the 6-8 months of treatment. | TB patients | Be defined as a 'poor' TB patient.                                                  | World Bank Loan, UK department for international development | Not Defined  | No  |
| Ukraine Red Cross Society Social                                | Mixed Intervention        | Provide DOTS in homes, incentive food interventions, psychological and                                                                                              | TB patients | Patients deemed 'high risk' by TB physician based on 11 self-reported risk factors: | USAID                                                        | Not defined. | Yes |

|                                |                    |                                                                        |                  |                                                                                                                    |                                                                                                  |              |    |
|--------------------------------|--------------------|------------------------------------------------------------------------|------------------|--------------------------------------------------------------------------------------------------------------------|--------------------------------------------------------------------------------------------------|--------------|----|
| Support Programme, Ukraine     |                    | career counselling, vouchers for transportation based on client needs. |                  | homeless, unemployed, a health care worker, a migrant, a refugee or immigrant, an ex-prisoner.                     |                                                                                                  |              |    |
| Social Security Board, Myanmar | Mixed Intervention | Nutritional support and micronutrient supplements and transportation   | TB Patients only | Students, self-employed, farmers and employees of companies with 5+ employees. Dependents of employees not covered | % Of wage paid by employer and worker. Co-financed by external donors and NGOs inc. Global Fund. | Not defined. | No |

|                                                                       |                                        |                                           |                                                                                                            |                                                                                                                                                                                                                                                                                                                                          |            |                     |           |
|-----------------------------------------------------------------------|----------------------------------------|-------------------------------------------|------------------------------------------------------------------------------------------------------------|------------------------------------------------------------------------------------------------------------------------------------------------------------------------------------------------------------------------------------------------------------------------------------------------------------------------------------------|------------|---------------------|-----------|
| <p>The<br/>Construction<br/>Worker's<br/>Welfare<br/>Board, India</p> | <p>Unconditional Cash<br/>Transfer</p> | <p>100,000 rupees paid to<br/>workers</p> | <p>People<br/>with heart<br/>disease,<br/>kidney<br/>ailment,<br/>asthma,<br/>tuberculosis<br/>or AIDS</p> | <p>Proof of having worked<br/>at least 90 days in the<br/>form of:<br/>1) the talati (president<br/>of a village)<br/>2) contractor<br/>3) rural labour<br/>commissioner<br/>4) labour<br/>commissioner<br/>5) the directorate of<br/>industrial safety and<br/>health.<br/><br/>Also need certificate,<br/>residential proof, three</p> | <p>Tax</p> | <p>Not defined.</p> | <p>No</p> |
|-----------------------------------------------------------------------|----------------------------------------|-------------------------------------------|------------------------------------------------------------------------------------------------------------|------------------------------------------------------------------------------------------------------------------------------------------------------------------------------------------------------------------------------------------------------------------------------------------------------------------------------------------|------------|---------------------|-----------|

|                                                                 |                    |                                                                                                                                                                                                               |                         |                                                                                                                                                                                                                |                                                                             |                                                                                                                                                                        |    |
|-----------------------------------------------------------------|--------------------|---------------------------------------------------------------------------------------------------------------------------------------------------------------------------------------------------------------|-------------------------|----------------------------------------------------------------------------------------------------------------------------------------------------------------------------------------------------------------|-----------------------------------------------------------------------------|------------------------------------------------------------------------------------------------------------------------------------------------------------------------|----|
|                                                                 |                    |                                                                                                                                                                                                               |                         | photos, proof of age and domicile certificate of Gujarat.                                                                                                                                                      |                                                                             |                                                                                                                                                                        |    |
| Nutrition-Sensitive Urban Safety Net Program, Republic of Congo | Mixed Intervention | Allocation of electronic vouchers for CFAF 30,000 (\$60). HHs exchange vouchers for 18 months.<br><br>Nutritional supplement - oil fortified with vitamin A and D for the treatment of moderate malnutrition. | TB-affected Households. | Households with less than \$60 income per month and with one of:<br>(a) a PLW:<br>(b) a PLHIV or person with TB under treatment and malnourished or<br>(c) at least 2 school age children not attending school | World food programme (40%)<br><br>Government of the Republic of Congo (60%) | - adhere to ARV or DOT<br><br>- Attent prenatal and postnatal monitoring for PLW and vaccinate children<br><br>- reintegrate children in school and ensure attendance. | No |

|                                   |                                 |                                                                                                                                                                       |                                      |              |                                  |              |     |
|-----------------------------------|---------------------------------|-----------------------------------------------------------------------------------------------------------------------------------------------------------------------|--------------------------------------|--------------|----------------------------------|--------------|-----|
| TB pension,<br>Timor-Leste        | Conditional<br>Cash<br>Transfer | US\$150 per month to<br>TB patients                                                                                                                                   | All TB<br>patients<br>(inc.<br>DSTB) | Not defined. | Government<br>of Timor-<br>Leste | Not defined. | Yes |
| Food<br>Basket,<br>Timor-Leste    | Nutrition<br>Support            | Rice, pulses, oil, milk,<br>and eggs provided on<br>a monthly basis                                                                                                   | All TB<br>patients<br>(inc.<br>DSTB) | Not defined. | Government<br>of Timor-<br>Leste | Not defined. | Yes |
| Travel<br>Support,<br>Timor-Leste | Conditional<br>Cash<br>Transfer | US\$60 for travel<br>support for 6 visits<br>provided in 3<br>installments at<br>treatment initiation,<br>end of intensive<br>treatment phase and<br>end of treatment | All TB<br>patients<br>(inc.<br>DSTB) | Not defined. | Government<br>of Timor-<br>Leste | Not defined. | Yes |

|                                                                  |                        |                                                                                                                                                                                                                                                                  |                         |                                                               |                      |              |     |
|------------------------------------------------------------------|------------------------|------------------------------------------------------------------------------------------------------------------------------------------------------------------------------------------------------------------------------------------------------------------|-------------------------|---------------------------------------------------------------|----------------------|--------------|-----|
| Support for Tuberculosis Patients and Their Families, Tajikistan | Food/Nutrition Support | 72kg of fortified wheat flour, 2.7kg of fortified vegetable oil, 7.2kg of pulses and 900g of iodised salt on a bimonthly basis to cover 80% of the required caloric needs of TB patients and 2 family members.<br><br>(families expected to cover the other 20%) | TB-affected households. | TB patients registered in the DOTS programme. (inc. children) | World Food Programme | Not defined. | Yes |
| Nutrition support to malnourished children                       | Food/Nutrition support | Nutrition support to malnourished children and other vulnerable groups in Lesotho                                                                                                                                                                                | TB patients.            | Undergoing TB treatment.                                      | World Food Programme | Not defined  | No  |

|                                                              |                         |                                                                                                      |                     |                                                                                         |                      |             |    |
|--------------------------------------------------------------|-------------------------|------------------------------------------------------------------------------------------------------|---------------------|-----------------------------------------------------------------------------------------|----------------------|-------------|----|
| and other vulnerable groups in Lesotho, Lesotho              |                         |                                                                                                      |                     |                                                                                         |                      |             |    |
| Programme National De La Nutrition Communautaire, Madagascar | Food /Nutrition support | Monthly ration of super cereal (children under 5 receive oil and sugar additionally)                 | TB outpatients      | Not defined                                                                             | World Food Programme | Not defined | No |
| Integrated Management and Acute Malnutrition (IMAM)          | Food/Nutrition Support  | Supplementary feeding of super cereal, oil pulses and cereals given to outpatients at health centres | TB and HIV patients | Adults who are moderately acute malnourished on ART or TB clients and their households. | World Food Programme | Not defined | No |



|                                                                                              |                               |                                                                                                                                                                                                     |                    |                                                                                                                            |                         |             |    |
|----------------------------------------------------------------------------------------------|-------------------------------|-----------------------------------------------------------------------------------------------------------------------------------------------------------------------------------------------------|--------------------|----------------------------------------------------------------------------------------------------------------------------|-------------------------|-------------|----|
| programme,<br>Eswatini                                                                       |                               |                                                                                                                                                                                                     |                    | Moderately acutely<br>malnourished Children<br>6-59 months and<br>PMTCT/antenatal care<br>clients and their<br>households. |                         |             |    |
| Food by<br>prescription<br>and<br>counselling<br>for PLHIV<br>and TB<br>patients,<br>Myanmar | Food/Nutrit<br>ion<br>Support | Individual daily client<br>ration of super cereal;<br>monthly household<br>ration of maize meal,<br>pulses, and vegetable<br>oil. (Corresponds to<br>half of the daily energy<br>requirements for a | MDR-TB<br>patients | Not detailed                                                                                                               | World Food<br>Programme | Not defined | No |

|                                                 |                        |                                                                                                   |                                      |                                                            |                      |                              |    |
|-------------------------------------------------|------------------------|---------------------------------------------------------------------------------------------------|--------------------------------------|------------------------------------------------------------|----------------------|------------------------------|----|
|                                                 |                        | household size of six for a month)                                                                |                                      |                                                            |                      |                              |    |
| Democratic Republic of the Congo *              | Food/Nutrition Support | Daily rations of 250g super cereal and 25g of vegetable oil.                                      | MDRTB patients                       | Not detailed                                               | World Food Programme | Not defined.                 | No |
| ZUNDAF Nutrition Flagship Programme, Zimbabwe * | Food/Nutrition Support | Food intervention and/or voucher distributed                                                      | People with TB who are food insecure | Not detailed                                               | World Food Programme | Not defined.                 | No |
| Zambia                                          | Food/Nutrition Support | Mobile delivery tracking system using electronic vouchers. Voucher valued at US\$25 per household | HIV and TB patients.                 | Those on ART or TB treatment and children under 24 months. | World Food programme | Attendance at health clinics | No |

|          |               |                                                                                                                                                                                   |                      |                                                                 |                      |              |    |
|----------|---------------|-----------------------------------------------------------------------------------------------------------------------------------------------------------------------------------|----------------------|-----------------------------------------------------------------|----------------------|--------------|----|
|          |               | <p>per month for 8 months.</p> <p>Food basket of cereal meal, pulses and vegetable oil. Selected food insecure and vulnerable households receive micro-nutrient blended food.</p> |                      |                                                                 |                      |              |    |
| Zimbabwe | Cash Transfer | Either cash or voucher (value not defined)                                                                                                                                        | TB and HIV patients. | Malnourished clients under ART, Pre ART, TB and PMTCT treatment | World Food Programme | Not defined. | No |

|              |                             |                                                                                                |                                                               |                                                                              |                                                                                          |                                         |     |
|--------------|-----------------------------|------------------------------------------------------------------------------------------------|---------------------------------------------------------------|------------------------------------------------------------------------------|------------------------------------------------------------------------------------------|-----------------------------------------|-----|
| South Africa | Unconditional Cash Transfer | A voucher (US\$15) offered monthly on collection of their treatment for a maximum of 8 months. | Individuals who are unable to work due to a disabling illness | Assessment by a doctor to determine disabling illness preventing work.       | South African Socoial Security Agency                                                    | Adherence to treatment                  | No  |
| South Africa | Conditional Cash Transfer   | A voucher (US\$15) offered monthly for a maximum of 8 months.                                  | Adult and paediatric TB patients                              | Must have a diagnosis of pulmonary DS-TB and attending intervention clinics. | Research Programme of the National Department of Health (South Africa), the Tuberculosis | Issued on collection of their treatment | Yes |

|         |                    |                                                  |                     |                                                    |                                                                                                                                                   |            |    |
|---------|--------------------|--------------------------------------------------|---------------------|----------------------------------------------------|---------------------------------------------------------------------------------------------------------------------------------------------------|------------|----|
|         |                    |                                                  |                     |                                                    | control assistance program (TB CAP), (the Netherlands, through the South African National TB Directorate) and the Wellcome Trust (United Kingdom) |            |    |
| Liberia | Mixed Intervention | Socioeconomic assistance program with three core | HIV, TB and Leprosy | Diagnosis of HIV, TB or Leprosy. Assessment by the | NGO                                                                                                                                               | Not stated | No |

|  |  |                                                                                                                                                                                                                                                                                           |                                                                                  |                                                          |  |  |  |
|--|--|-------------------------------------------------------------------------------------------------------------------------------------------------------------------------------------------------------------------------------------------------------------------------------------------|----------------------------------------------------------------------------------|----------------------------------------------------------|--|--|--|
|  |  | <p>components: (1) transportation reimbursement; (2) food support interventions (sardines, beans rice, vegetable oil; and (3) additional social assistance. All HIV, TB and leprosy patients are eligible for components one and three.</p> <p>Additional support in the form of cash</p> | <p>patients eligible for component s 1 &amp; 3. Componen t 2 is TB specific.</p> | <p>Social Protection Officer for additional support.</p> |  |  |  |
|--|--|-------------------------------------------------------------------------------------------------------------------------------------------------------------------------------------------------------------------------------------------------------------------------------------------|----------------------------------------------------------------------------------|----------------------------------------------------------|--|--|--|

|         |                           |                                                                                                                  |                 |                                                                                                                 |                                                                  |                |     |
|---------|---------------------------|------------------------------------------------------------------------------------------------------------------|-----------------|-----------------------------------------------------------------------------------------------------------------|------------------------------------------------------------------|----------------|-----|
|         |                           | transfer for safe housing, school fees or auxiliary nutritional interventions if patients lack familial support. |                 |                                                                                                                 |                                                                  |                |     |
| Nigeria | Conditional Cash Transfer | Cash transfer monthly US\$15 for 6 months (up to a total of US\$90)                                              | DS-TB Patients  | Patients participating in first line anti-tuberculosis treatment (DR-TB not eligible) in Ebonyi State, Nigeria. | National TB and Leprosy Control Programme. Ebonyi State Nigeria. | Not stated.    | Yes |
| China   | Mixed Intervention        | Capped treatment cost, insurance reimbursement. Capped total treatment intervention cost at                      | MDR-TB Patients | Patients with multidrug-resistant or rifampicin-resistant tuberculosis who were consecutively                   | Bill and Melinda Gates Foundation                                | Unconditional. | Yes |

|  |  |                                                                                                                                                                                                                                                                                                                                 |  |                                                                  |  |  |  |
|--|--|---------------------------------------------------------------------------------------------------------------------------------------------------------------------------------------------------------------------------------------------------------------------------------------------------------------------------------|--|------------------------------------------------------------------|--|--|--|
|  |  | <p>US\$4644. Insurance reimbursement and project subsidies limited patients' expenses to 10% of charges for services within the intervention. Patients given transportation subsidy of \$15-50 for each outpatient visit to hospital</p> <p>Health-care providers at community health centres, township health centres, and</p> |  | <p>diagnosed in a 12-month period after the programme began.</p> |  |  |  |
|--|--|---------------------------------------------------------------------------------------------------------------------------------------------------------------------------------------------------------------------------------------------------------------------------------------------------------------------------------|--|------------------------------------------------------------------|--|--|--|



|                              |                   |                                                                                   |                     |                                                                                                                                                       |                                          |              |     |
|------------------------------|-------------------|-----------------------------------------------------------------------------------|---------------------|-------------------------------------------------------------------------------------------------------------------------------------------------------|------------------------------------------|--------------|-----|
|                              |                   | village clinics given a total of \$15-50 per month per patient for providing DOT. |                     |                                                                                                                                                       |                                          |              |     |
| China                        | Cash Transfer     | Financial subsidy (RMB 1080/US\$170) and transport incentive (RMB 80/US\$30 ).    | TB Migrant Patients | Poverty assessment: households with an income < RMB 840 OR stopped working due to infection of TB OR housing rental is over 1/3 of household income.) | Communicable disease research consortium | Not defined  | Yes |
| Center for Sharing, Thailand | Financial Support | Women's organizations whose members were of high socioeconomic status             | TB patients         | Eligible patients were identified using a screening questionnaire: (1) Do                                                                             | Stop TB partnership for initial funding. | Not defined. | Yes |

|  |  |                                                                                                                                                                                                                                                                                                                                  |  |                                                                                                                                                                                                                                                                                                                                                          |  |  |  |
|--|--|----------------------------------------------------------------------------------------------------------------------------------------------------------------------------------------------------------------------------------------------------------------------------------------------------------------------------------|--|----------------------------------------------------------------------------------------------------------------------------------------------------------------------------------------------------------------------------------------------------------------------------------------------------------------------------------------------------------|--|--|--|
|  |  | <p>supported impoverished people with TB by providing social and economic support. People with TB received financial support and home visits (social support)</p> <p>In each visit, four to six volunteers visited the patient at home. The volunteers usually brought milk, eggs, clothes, and cash to support the patient.</p> |  | <p>you have health insurance? (2) Do you have less than US\$ 3 for the whole family or did you experience a food shortage during the last month? (3) Are you able to pay for travel to the TB clinic? (4) Do you have family members, friends or relatives to help when encountering a financial crisis?"</p> <p>Criteria for home support included:</p> |  |  |  |
|--|--|----------------------------------------------------------------------------------------------------------------------------------------------------------------------------------------------------------------------------------------------------------------------------------------------------------------------------------|--|----------------------------------------------------------------------------------------------------------------------------------------------------------------------------------------------------------------------------------------------------------------------------------------------------------------------------------------------------------|--|--|--|

|         |                    |                                                                                                                                                                              |                                                                    |                                                                                                                                                    |                                                                     |               |     |
|---------|--------------------|------------------------------------------------------------------------------------------------------------------------------------------------------------------------------|--------------------------------------------------------------------|----------------------------------------------------------------------------------------------------------------------------------------------------|---------------------------------------------------------------------|---------------|-----|
|         |                    |                                                                                                                                                                              |                                                                    | extremely poor TB patients, living alone, living with elderly caregivers, or being isolated from the community and patient consent to home visit." |                                                                     |               |     |
| Moldova | Mixed Intervention | (1) Small cash [20EUR] Paid monthly during out-patient treatment (stopped if treatment interrupted for >5 days)<br>(2) Bigger cash [92EUR] Paid once at the end of treatment | (1) All smear positive patients (including those with MDRTB) after | All TB patients in Moldova (excluding Transnistria)                                                                                                | (1-3) Global Fund<br>(4-9) National Health Insurance Company (NHIC) | Not detailed. | Yes |

|  |  |                                                                                                                                                                                                                                                                                                                                               |                                                                                                                                                             |  |                                   |  |  |
|--|--|-----------------------------------------------------------------------------------------------------------------------------------------------------------------------------------------------------------------------------------------------------------------------------------------------------------------------------------------------|-------------------------------------------------------------------------------------------------------------------------------------------------------------|--|-----------------------------------|--|--|
|  |  | <p>(3) reimbursement of transport cost [cost of tickets] paid either daily OR monthly during outpatient treatment</p> <p>(4) reimbursement for transport cost [cost of tickets] paid daily during out patient treatment (only intensive phase)</p> <p>(5) Reimbursement of transport cost [cost of tickets] paid weekly during outpatient</p> | <p>hospital discharge</p> <p>(2) All patients who score &gt;5 on social assessment</p> <p>(3) All smear positive patients (including those with MDR TB)</p> |  | <p>(10) Local administrations</p> |  |  |
|--|--|-----------------------------------------------------------------------------------------------------------------------------------------------------------------------------------------------------------------------------------------------------------------------------------------------------------------------------------------------|-------------------------------------------------------------------------------------------------------------------------------------------------------------|--|-----------------------------------|--|--|

|  |  |                                                                                                                                                                                                                                                                                                                        |                                                                                                                                                           |  |  |  |  |
|--|--|------------------------------------------------------------------------------------------------------------------------------------------------------------------------------------------------------------------------------------------------------------------------------------------------------------------------|-----------------------------------------------------------------------------------------------------------------------------------------------------------|--|--|--|--|
|  |  | <p>treatment (only intensive phase)</p> <p>(6) Reimbursement for transport cost [cost of tickets or 4.8EURO lump sum] paid monthly during out-patient treatment (only intensive phase)</p> <p>(7) Vouchers for food hygiene and products [2.2 EUR] paid dairly during out-patient treatment (only intensive phase)</p> | <p>after hospital discharge</p> <p>(4) New smear negative patients living in urban areas</p> <p>(5) New smear negative patients living in rural areas</p> |  |  |  |  |
|--|--|------------------------------------------------------------------------------------------------------------------------------------------------------------------------------------------------------------------------------------------------------------------------------------------------------------------------|-----------------------------------------------------------------------------------------------------------------------------------------------------------|--|--|--|--|

|  |  |                                                                                                                                                                                                                                                                                                                                  |                                                                                                                                                         |  |  |  |  |
|--|--|----------------------------------------------------------------------------------------------------------------------------------------------------------------------------------------------------------------------------------------------------------------------------------------------------------------------------------|---------------------------------------------------------------------------------------------------------------------------------------------------------|--|--|--|--|
|  |  | <p>(8) Vouchers for food hygiene and products [15.4 EUR] paid weekly during out-patient treatment (only intensive phase, stopped if treatment interrupted for &gt;3 days)</p> <p>(9) Vouchers for food hygiene and products [61.6 EUR] paid monthly during out-patient treatment (only intensive phase, stopped if treatment</p> | <p>(6) New smear negative patients living in rural areas</p> <p>(7) New smear negative patients living in urban areas</p> <p>(8) New smear negative</p> |  |  |  |  |
|--|--|----------------------------------------------------------------------------------------------------------------------------------------------------------------------------------------------------------------------------------------------------------------------------------------------------------------------------------|---------------------------------------------------------------------------------------------------------------------------------------------------------|--|--|--|--|

|                                      |                         |                                                                                                         |                                                                                                              |                                                                                   |               |       |     |
|--------------------------------------|-------------------------|---------------------------------------------------------------------------------------------------------|--------------------------------------------------------------------------------------------------------------|-----------------------------------------------------------------------------------|---------------|-------|-----|
|                                      |                         | interrupted for >5 days)<br>(10) Other support [clothes, wood etc] paid once                            | patients living in rural areas<br>(9) New smear negative patients living in rural areas<br>(10) All Patients |                                                                                   |               |       |     |
| Treatment Support Group (TSG), India | Community Participation | Socially responsible citizens and volunteers provide social support to each needy TB patient: access to | All TB patients                                                                                              | Need assessment by medical officer, multipurpose health worker, and DOT provider. | Not detailed. | None. | Yes |

|                                               |                        |                                                                                                                                                        |                       |              |                                                               |              |      |
|-----------------------------------------------|------------------------|--------------------------------------------------------------------------------------------------------------------------------------------------------|-----------------------|--------------|---------------------------------------------------------------|--------------|------|
|                                               |                        | information, free and quality services and social welfare programs, empowering the patient for making decision to complete the treatment successfully. |                       |              |                                                               |              |      |
| Nutritional Supplement for TB patients, India | Food/Nutrition Support | Variable but for example: Kits consisting of 5 kg rice, 5 kg pulses, oil, jaggery were given.                                                          | MDR-TB patients only. | Not detailed | Panchayats [Local Self Government] or Philanthropists or NGOs | Not detailed | Yes. |



|                                                   |                           |                                                                              |              |               |               |               |               |
|---------------------------------------------------|---------------------------|------------------------------------------------------------------------------|--------------|---------------|---------------|---------------|---------------|
| Transportation support, India <sup>54</sup>       | Conditional Cash Transfer | Additional Rs500/per month as travel allowance for their twice months visits | TB patients. | Not detailed. | Not detailed. | Not detailed. | Not detailed. |
| * Interventions employed in humanitarian settings |                           |                                                                              |              |               |               |               |               |

## Glossary of Key Terms

|                           |                                                                                                                                                                                                                                                                     |
|---------------------------|---------------------------------------------------------------------------------------------------------------------------------------------------------------------------------------------------------------------------------------------------------------------|
| Beneficiary               | The individuals or households who are targeted to benefit from the social protection intervention. This can include or go beyond the recipient.                                                                                                                     |
| Catastrophic Costs        | Total TB care costs, that is direct medical (i.e. consultations, tests, pills) and non-medical (i.e. food, travel, accommodation) out-of-pocket costs and lost income exceeding 20% of a household's annual pre-TB income, exceeding 20% of annual household income |
| Conditional Cash Transfer | Direct, regular, and predictable transfers that are given with the requirement that the recipient meets certain conditions.                                                                                                                                         |
| Direct costs              | Costs that are directly attributable to patient care and paid for out-of-pocket. Can include direct medical (i.e. consultations, tests, pills) and non-medical (i.e. travel, food, accommodation) out-of-pocket costs)                                              |
| Financial Intervention    | Any social protection intervention in the form of a financial payment to the recipient.                                                                                                                                                                             |
| Indirect costs            | Costs incurred during treatment or illness that are not because of medical management of the disease. Indirect costs include lost income and productivity.                                                                                                          |
| Multilateral Organisation | Organisations formed by three or more nations to work on issues relevant to them.                                                                                                                                                                                   |

Psychosocial Support Support given to help meet the mental, emotional, social, and spiritual needs of people with TB and their households.

---

Recipient Individuals or households who receive the social protection intervention.

---

Social Protection Social protection systems help individuals and families, especially the poor and vulnerable, cope with crises and shocks, find jobs, improve productivity, invest in the health and education of their children, and protect the aging population. Social protection programs are at the heart of boosting human capital for the world's most vulnerable. They empower people to be healthy, pursue their education, and seek opportunity to lift themselves and their families out of poverty.

---

TB Inclusive Interventions in which having tuberculosis is an inclusion criterion for the programme but may not be the only one.

---

TB Sensitive Interventions that can potentially affect tuberculosis epidemiology and control, but it is not the primary design.

---

TB Specific Interventions targeted specifically at households or individuals affected by TB.

Unconditional Cash Transfer      Direct, regular, and predictable transfers that do not have any requirements in terms of how they are spent or conditions to be received.

## Full Search Queries

### PubMed (includes MEDLINE) search query

("2012"[Date - Publication] : "2021"[Date - Publication]) AND (Tuberculosis[MeSH] OR Tuberculosis[Title/Abstract] OR TB[Title/Abstract] OR "Mycobacterium tuberculosis" [Title/Abstract] OR "Pulmonary TB" [Title/Abstract] OR "TB affected" [Title/Abstract] OR "TB infected" [Title/Abstract] OR "TB patients" [Title/Abstract] OR "Drug-resistant TB" [Title/Abstract] OR "TB individuals" [Title/Abstract] OR "TB affected households" [Title/Abstract] OR "TB prevalent" [Title/Abstract] OR "Pulmonary tuberculosis" [Title/Abstract] OR "Pulmonary TB" [Title/Abstract] OR PTB[Title/Abstract]) AND (Social protection[Title/Abstract] OR "Social safety net" [Title/Abstract] OR "Socioeconomic support" [Title/Abstract] OR "Social support" [Title/Abstract] OR "Economic support" [Title/Abstract] OR "Financial support" [Title/Abstract] OR "Cash transfers" [Title/Abstract] OR "Conditional cash transfers" [Title/Abstract] OR "Unconditional cash transfers" [Title/Abstract] OR "supplementary feeding programmes" [Title/Abstract] OR "food stamps" [Title/Abstract] OR "vouchers" [Title/Abstract] OR "coupons" [Title/Abstract] OR "in-kind transfers" [Title/Abstract] OR "school supplies" [Title/Abstract] OR "uniforms" [Title/Abstract] OR "Food baskets" [Title/Abstract] OR "Food rations" [Title/Abstract] OR "Social risk management" [Title/Abstract] OR Transportation[Title/Abstract] OR "Government financing" [Title/Abstract] OR Reimbursement[Title/Abstract] OR "Support groups" [Title/Abstract] OR Education[Title/Abstract] OR "Community support" [Title/Abstract] OR Welfare [Title/Abstract] OR Support[Title/Abstract] OR Intervention[Title/Abstract] OR Program[Title/Abstract] OR Scheme[Title/Abstract] OR Policy[Title/Abstract] OR Assistance[Title/Abstract] OR Livelihood support[Title/Abstract] OR

Impact[Title/Abstract] OR Affect[Title/Abstract] OR Effect[Title/Abstract] OR  
Association[Title/Abstract] OR Associated[Title/Abstract] OR  
Consequence[Title/Abstract] OR incentive[Title/Abstract] OR enabler[Title/Abstract])  
AND (Treatment[Title/Abstract] OR Outcome[Title/Abstract] OR  
Success[Title/Abstract] OR Rates[Title/Abstract] OR Unsuccessful[Title/Abstract] OR  
Uptake[Title/Abstract] OR Enrollment[Title/Abstract] OR Adherence[Title/Abstract]  
OR Cured[Title/Abstract] OR Completed[Title/Abstract] OR Treated[Title/Abstract]  
OR "Follow-up" [Title/Abstract] OR "loss to follow-up" [Title/Abstract] OR  
Relapse[Title/Abstract] OR Recurrence[Title/Abstract] OR "Adverse outcome"  
[Title/Abstract] OR "Diagnostic pathways" [Title/Abstract] OR "TB testing"  
[Title/Abstract] OR "Quality of life" [Title/Abstract] OR Default[Title/Abstract] OR  
"Care cascade" [Title/Abstract] OR Socioeconomic[Title/Abstract] OR  
Outcome[Title/Abstract] OR "Financial burden" [Title/Abstract] OR "Economic  
burden" [Title/Abstract] OR "Economic consequences" [Title/Abstract] OR "Social  
consequences" [Title/Abstract] OR "Socioeconomic consequences" [Title/Abstract]  
OR "Social impact" [Title/Abstract] OR "Socioeconomic impact" [Title/Abstract] OR  
Costs [Title/Abstract] OR Expenditure[Title/Abstract] OR Expenses[Title/Abstract]  
OR Spending[Title/Abstract] OR Catastrophic[Title/Abstract] OR  
Expenditure[Title/Abstract] OR "Catastrophic costs" [Title/Abstract] OR  
Impoverishment[Title/Abstract] OR "Coping strategies" [Title/Abstract] OR  
Poverty[Title/Abstract] OR "Food security" [Title/Abstract] OR "Food insecurity"  
[Title/Abstract] OR "Loans" [Title/Abstract] OR "Sold assets" [Title/Abstract] OR  
Dissaving[Title/Abstract] OR Deprivation[Title/Abstract] OR Defray[Title/Abstract] OR  
Mitigate[Title/Abstract])

Embase search query

('tuberculosis'/exp OR tuberculosis:ab,ti OR TB:ab,ti OR 'Mycobacterium tuberculosis':ab,ti OR 'Pulmonary TB':ab,ti OR 'TB affected':ab,ti OR 'TB infected':ab,ti OR 'TB patients':ab,ti OR 'Patients with TB':ab,ti OR 'People with TB':ab,ti OR 'Drug-resistant TB':ab,ti OR 'TB individuals':ab,ti OR 'TB affected households':ab,ti OR 'TB prevalent':ab,ti OR 'Pulmonary tuberculosis':ab,ti OR 'Pulmonary TB':ab,ti OR PTB:ab,ti) AND (Social protection:ab,ti OR 'Social safety net':ab,ti OR 'Socioeconomic support':ab,ti OR 'Social support':ab,ti OR 'Economic support':ab,ti OR 'Financial support':ab,ti OR 'Cash transfers':ab,ti OR 'Conditional cash transfers':ab,ti OR 'Unconditional cash transfers':ab,ti OR 'food-based programmes':ab,ti OR 'supplementary feeding programmes':ab,ti OR 'food stamps':ab,ti OR 'vouchers':ab,ti OR coupons:ab,ti OR 'in-kind transfers':ab,ti OR 'school supplies':ab,ti OR uniforms:ab,ti OR 'Price subsidies for food':ab,ti OR 'Price subsidies for electricity':ab,ti OR 'Price subsidies for public transport':ab,ti OR 'Public works programmes':ab,ti OR 'Fee waivers for health care':ab,ti OR 'Exemptions for health care':ab,ti OR 'Fee waivers for schooling':ab,ti OR 'Exemptions for schooling':ab,ti OR 'Fee waivers for utilities':ab,ti OR 'Exemptions for utilities':ab,ti OR 'Food baskets':ab,ti OR 'Food rations':ab,ti OR 'Protections against shocks':ab,ti OR 'Social risk management':ab,ti OR Transportation:ab,ti OR 'Government financing':ab,ti OR Reimbursement:ab,ti OR 'Support groups':ab,ti OR Education:ab,ti OR 'Community support':ab,ti OR Welfare:ab,ti OR Support:ab,ti OR Intervention:ab,ti OR Program:ab,ti OR Scheme:ab,ti OR Policy:ab,ti OR Assistance:ab,ti OR Livelihood support:ab,ti OR Impact:ab,ti OR Affect:ab,ti OR Effect:ab,ti OR Association:ab,ti OR Associated:ab,ti OR Consequence:ab,ti OR incentive:ab,ti OR enabler:ab,ti) AND (Treatment:ab,ti OR Outcome:ab,ti OR

Success:ab,ti OR Rates:ab,ti OR Unsuccessful:ab,ti OR Uptake:ab,ti OR  
Enrollment:ab,ti OR Adherence:ab,ti OR Cured:ab,ti OR Completed:ab,ti OR  
Treated:ab,ti OR 'Follow-up':ab,ti OR 'loss to follow-up':ab,ti OR Relapse:ab,ti OR  
Recurrence:ab,ti OR 'Adverse outcome':ab,ti OR 'Diagnostic pathways':ab,ti OR 'TB  
testing':ab,ti OR 'Quality of life':ab,ti OR default:ab,ti OR 'care cascade':ab,ti OR  
Socioeconomic:ab,ti OR Outcome:ab,ti OR 'Financial burden':ab,ti OR 'Economic  
burden':ab,ti OR 'Economic consequences':ab,ti OR 'Social consequences':ab,ti OR  
'Socioeconomic consequences':ab,ti OR 'Social impact':ab,ti OR 'Socioeconomic  
impact':ab,ti OR Costs:ab,ti OR Expenditure:ab,ti OR Expenses:ab,ti OR  
Spending:ab,ti OR Catastrophic:ab,ti OR Expenditure:ab,ti OR 'Catastrophic  
costs':ab,ti OR Impoverishment:ab,ti OR 'Coping strategies':ab,ti OR Poverty:ab,ti  
OR 'Food security':ab,ti OR 'Food insecurity':ab,ti OR Loans:ab,ti OR 'Sold  
assets':ab,ti OR Dissaving:ab,ti OR Deprivation:ab,ti OR Defray:ab,ti OR  
Mitigate:ab,ti AND [2012-2021]/py)



Web of Science search query

*Note: (Unable to include date in syntax; date set to "2012-2021")*

TI=(Tuberculosis OR TB OR "Mycobacterium tuberculosis" OR "Pulmonary TB" OR "TB affected" OR "TB infected" OR "TB patients" OR "Drug-resistant TB" OR "TB individuals" OR "TB affected households" OR "TB prevalent" OR "Pulmonary tuberculosis" OR "Pulmonary TB" OR PTB) AND TI=(Social protection OR "Social safety net" OR "Socioeconomic support" OR "Social support" OR "Economic support" OR "Financial support" OR "Cash transfers" OR "Conditional cash transfers" OR "Unconditional cash transfers" OR "supplementary feeding programmes" OR "food stamps" OR "vouchers" OR "coupons" OR "in-kind transfers" OR "school supplies" OR "uniforms" OR "Food baskets" OR "Food rations" OR "Social risk management" OR Transportation OR "Government financing" OR Reimbursement OR "Support groups" OR Education OR "Community support" OR Welfare OR Support OR Intervention OR Program OR Scheme OR Policy OR Assistance OR Livelihood support OR Impact OR Affect OR Effect OR Association OR Associated OR Consequence OR incentive OR enabler) AND TS=(Treatment OR Outcome OR Success OR Rates OR Unsuccessful OR Uptake OR Enrollment OR Adherence OR Cured OR Completed OR Treated OR "Follow-up" OR "loss to follow-up" OR Relapse OR Recurrence OR "Adverse outcome" OR "Diagnostic pathways" OR "TB testing" OR "Quality of life" OR Default OR "Care cascade" OR Socioeconomic OR Outcome OR "Financial burden" OR "Economic burden" OR "Economic consequences" OR "Social consequences" OR "Socioeconomic consequences" OR "Social impact" OR "Socioeconomic impact" OR Costs OR Expenditure OR Expenses OR Spending OR Catastrophic OR Expenditure OR "Catastrophic costs" OR Impoverishment OR "Coping strategies"

OR Poverty OR "Food security" OR "Food insecurity" OR Loans OR "Sold assets"

OR Dissaving OR Deprivation OR Defray OR Mitigate)
